# Supplementary material for: Association of triglyceride-glucose index and its combined obesity indicators and kidney stones in the non-diabetic population of southwestern China
Source: Research Square preprint supplement (doi:10.21203/rs.3.rs-8643580/v1), 2026-02-22
Supplement: Supplementary file 1 [file 7b91343879f326af39750ae2.docx]

| **Table 1** | | | | |
| --- | --- | --- | --- | --- |
| Baseline characteristics of the study population (n=87,399) | | | | |
| Variables | All  (n=87,399) | KSs group  (n=2,575) | Non-KSs group  (n=84,824) | *P* value |
| Demographic data |  |  |  |  |
| Sex (female), n (%) | 40,561 (46.4) | 752(29.2) | 39809(46.9) | <0.001 |
| Age (years) | 45.28±11.70 | 47.08±11.01 | 45.22±11.72 | <0.001 |
| SBP (mmHg) | 119.38±16.52 | 122.90±16.84 | 119.27±16.50 | <0.001 |
| DBP (mmHg) | 73.46±11.13 | 76.44±11.69 | 73.37±11.10 | <0.001 |
| Body weight (kg) | 64.03±11.33 | 66.96±11.68 | 63.94±11.31 | <0.001 |
| Height (cm) | 163.58±8.33 | 164.76±7.84 | 163.55±8.34 | <0.001 |
| BMI (kg/m2) | 23.81±3.03 | 24.55±3.10 | 23.79±3.03 | <0.001 |
| Waist circumferences (cm) | 80.87±9.71 | 83.93±9.48 | 80.77±9.70 | <0.001 |
| Hip circumferences (cm) | 94.37±6.01 | 95.25±6.05 | 94.35±6.01 | <0.001 |
| Waist-Hip ratio | 0.86±0.07 | 0.88±0.07 | 0.85±0.07 | <0.001 |
| Hypertension, n (%) | 5490 (6.28) | 288 (11.18) | 5202 (6.13) | <0.001 |
| Dyslipidemia, n (%) | 53181 (60.85) | 1749 (67.92) | 51432 (60.63) | <0.001 |
| Smoking, n (%) | 19,611 (22.4) | 814 (31.6) | 18,797 (22.2) | <0.001 |
| Drinking, n (%) | 32,796 (37.5) | 1,293 (50.2) | 31,443 (37.1) | <0.001 |
| ALT (U/L) | 22 (15, 33) | 25 (17, 37) | 22 (15, 33) | <0.001 |
| AST (U/L) | 27.04±10.03 | 28.18±10.19 | 27.00±10.02 | <0.001 |
| GGT (U/L) | 22 (15, 37) | 27 (18, 45) | 22 (15, 37) | <0.001 |
| FPG (mmol/L) | 4.94±0.55 | 4.99±0.59 | 4.95±0.55 | <0.001 |
| HbA1c (%) | 5.36±0.37 | 5.40±0.37 | 5.36±0.37 | <0.001 |
| Total cholesterol (mmol/L) | 4.83±0.88 | 4.92±0.87 | 4.83±0.88 | <0.001 |
| Triglycerides (mmol/L) | 1.30 (0.91, 1.91) | 1.51 (1.04, 2.16) | 1.29 (0.90, 1.90) | <0.001 |
| LDL-cholesterol (mmol/L) | 2.81±0.76 | 2.88±0.75 | 2.81±0.76 | <0.001 |
| HDL-cholesterol (mmol/L) | 1.36±0.32 | 1.31±0.31 | 1.36±0.32 | <0.001 |
| Uric acid (μmol/L) | 343.61±87.67 | 367.02±94.26 | 342.90±87.36 | <0.001 |
| Serum Total Calcium (mmol/L) | 2.32±50.10 | 2..32±0.10 | 2.32±0.10 | 0.265 |
| eGFR (ml/min/1.73m2) | 105.23±13.42 | 102.83±13.36 | 105.30±13.42 | <0.001 |
| TyR | 8.56±0.56 | 8.70±0.57 | 8.56±0.56 | <0.001 |
| TyR-WC | 694.81±111.97 | 732.43±111.77 | 693.67±111.78 | <0.001 |
| TyR-WHR | 7.34±0.93 | 7.67±0.91 | 7.33±0.93 | <0.001 |
| TyR-BMI | 204.59±34.00 | 214.21±35.08 | 204.29±33.92 | <0.001 |
| TyR-NC | 297.07±42.99 | 312.45±44.12 | 296.60±42.87 | <0.001 |
| TyR-WHtR | 4.25±0.64 | 4.44±0.62 | 4.24±0.64 | <0.001 |
| Abbreviations: systolic pressure (SBP); diastolic pressure (DBP); type 2 diabetes mellitus (T2DM); fasting plasma glucose (FPG); body mass index (BMI); alamine aminotransferase (ALT); aspartate aminotransferase (AST); gamma-glutamyltransferase (GGT); hemoglobin A1c (HbA1c) ; estimated glomerular filtration rate (eGFR); triglyceride-glucose index (TyG); waist circumference (WC); waist to hip ratio (WHR); neck circumference (NC); waist to height ratio (WHtR) | | | | |
|  | | | | |
