# Supplementary material for: Association of triglyceride-glucose index and its combined obesity indicators and kidney stones in the non-diabetic population of southwestern China
Source: Research Square preprint supplement (doi:10.21203/rs.3.rs-8643580/v1), 2026-02-22
Supplement: Supplementary file 2 [file 9d60412eecc2e70c4e91512d.docx]

| **Table 3**  Subgroup analysis of the association between TyG and its combined indicators with KSs | | | | | | | | | | | | | | | | | | | |
| --- | --- | --- | --- | --- | --- | --- | --- | --- | --- | --- | --- | --- | --- | --- | --- | --- | --- | --- | --- |
|  | | | TyG | |  | TyG-WC | |  | TyG-WHR | |  | TyG-BMI | |  | TyG-NC | |  | TyG-WHtR | |
| Subgroup | | Quartile | OR (95% CI) | P value |  | OR (95% CI) | P value |  | OR (95% CI) | P value |  | OR (95% CI) | P value |  | OR (95% CI) | P value |  | OR (95% CI) | P value | |
| Sex | Male |  |  | 0.395 |  |  | 0.057 |  |  | 0.156 |  |  | 0.006 |  |  | 0.046 |  |  | 0.008 | |
| Q1 | Reference |  |  | Reference |  |  | Reference |  |  | Reference |  |  | Reference |  |  | Reference |  | |
| Q2 | 1.11 (0.96-1.28) |  |  | 1.19 (1.03-1.38) |  |  | 1.21 (1.04-1.41) |  |  | 1.11 (0.96-1.28) |  |  | 1.11 (0.96-1.28) |  |  | 1.15 (0.99-1.34) |  | |
| Q3 | 1.22 (1.06-1.41) |  |  | 1.31 (1.14-1.52) |  |  | 1.35 (1.16-1.57) |  |  | 1.26 (1.09-1.45) |  |  | 1.22 (1.06-1.41) |  |  | 1.38 (1.19-1.61) |  | |
| Q4 | 1.28 (1.11-1.48) |  |  | 1.54 (1.33-1.79) |  |  | 1.59 (1.37-1.84) |  |  | 1.49 (1.29-1.72) |  |  | 1.48 (1.28-1.71) |  |  | 1.67 (1.44-1.94) |  | |
| Female | Q1 | Reference |  |  | Reference |  |  | Reference |  |  | Reference |  |  | Reference |  |  | Reference |  | |
| Q2 | 0.90 (0.72-1.12) |  |  | 1.16 (0.93-1.46) |  |  | 1.27 (1.01-1.59) |  |  | 1.01 (0.81-1.26) |  |  | 1.24 (1.00-1.55) |  |  | 1.19 (0.95-1.49) |  | |
| Q3 | 0.99 (0.80-1.23) |  |  | 1.27 (1.01-1.59) |  |  | 1.30 (1.04-1.64) |  |  | 1.13 (0.91-1.41) |  |  | 1.04 (0.83-1.31) |  |  | 1.36 (1.09-1.72) |  | |
| Q4 | 1.19 (0.95-1.49) |  |  | 1.38 (1.09-1.76) |  |  | 1.44 (1.12-1.84) |  |  | 1.10 (0.88-1.39) |  |  | 1.36 (1.09-1.71) |  |  | 1.40 (1.09-1.80) |  | |
| Age_group | <50 |  |  | 0.228 |  |  | 0.077 |  |  | 0.150 |  |  | 0.063 |  |  | 0.193 |  |  | 0.005 | |
| Q1 | Reference |  |  | Reference |  |  | Reference |  |  | Reference |  |  | Reference |  |  | Reference |  | |
| Q2 | 1.12 (0.95-1.33) |  |  | 1.09 (0.91-1.31) |  |  | 1.14 (0.95-1.37) |  |  | 0.93 (0.78-1.11) |  |  | 0.95 (0.79-1.15) |  |  | 1.05 (0.88-1.26) |  | |
| Q3 | 1.09 (0.92-1.29) |  |  | 1.14 (0.94-1.39) |  |  | 1.19 (0.98-1.44) |  |  | 1.04 (0.87-1.23) |  |  | 1.04 (0.84-1.29) |  |  | 1.21 (1.01-1.45) |  | |
| Q4 | 1.34 (1.12-1.59) |  |  | 1.46 (1.19-1.80) |  |  | 1.50 (1.22-1.84) |  |  | 1.33 (1.11-1.59) |  |  | 1.30 (1.03-1.65) |  |  | 1.55 (1.29-1.87) |  | |
| ≥50 | Q1 | Reference |  |  | Reference |  |  | Reference |  |  | Reference |  |  | Reference |  |  | Reference |  | |
| Q2 | 1.12 (0.93-1.35) |  |  | 1.22 (1.00-1.49) |  |  | 1.16 (0.95-1.42) |  |  | 1.22 (1.01-1.48) |  |  | 1.11 (0.90-1.38) |  |  | 1.27 (1.05-1.53) |  | |
| Q3 | 1.24 (1.03-1.48) |  |  | 1.14 (0.93-1.40) |  |  | 1.28 (1.05-1.57) |  |  | 1.10 (0.91-1.34) |  |  | 1.16 (0.93-1.45) |  |  | 1.22 (1.00-1.48) |  | |
| Q4 | 1.14 (0.95-1.38) |  |  | 1.28 (1.04-1.58) |  |  | 1.42 (1.15-1.74) |  |  | 1.32 (1.09-1.61) |  |  | 1.25 (0.99-1.60) |  |  | 1.44 (1.19-1.75) |  | |
| Hypertension | No |  |  | 0.300 |  |  | 0.267 |  |  | 0.450 |  |  | 0.062 |  |  | 0.704 |  |  | 0.031 | |
| Q1 | Reference |  |  | Reference |  |  | Reference |  |  |  |  |  |  |  |  |  |  | |
| Q2 | 1.14 (1.00-1.31) |  |  | 1.13 (0.98-1.31) |  |  | 1.11 (0.96-1.29) |  |  | 1.03 (0.90-1.18) |  |  | 1.02 (0.87-1.18) |  |  | 1.17 (1.02-1.35) |  | |
| Q3 | 1.21 (1.06-1.38) |  |  | 1.24 (1.07-1.44) |  |  | 1.28 (1.10-1.49) |  |  | 1.13 (0.98-1.29) |  |  | 1.14 (0.96-1.34) |  |  | 1.32 (1.15-1.53) |  | |
| Q4 | 1.37 (1.19-1.57) |  |  | 1.50 (1.28-1.76) |  |  | 1.55 (1.32-1.81) |  |  | 1.41 (1.23-1.62) |  |  | 1.38 (1.16-1.66) |  |  | 1.63 (1.41-1.89) |  | |
| Yes | Q1 | Reference |  |  | Reference |  |  | Reference |  |  | Reference |  |  | Reference |  |  | Reference |  | |
| Q2 | 0.87 (0.61-1.24) |  |  | 0.84 (0.58-1.22) |  |  | 0.94 (0.65-1.37) |  |  | 0.93 (0.65-1.33) |  |  | 0.86 (0.56-1.32) |  |  | 1.09 (0.77-1.55) |  | |
| Q3 | 1.05 (0.75-1.48) |  |  | 0.96 (0.66-1.39) |  |  | 0.94 (0.64-1.37) |  |  | 0.94 (0.66-1.35)3 |  |  | 0.93 (0.60-1.46) |  |  | 1.05 (0.74-1.50) |  | |
| Q4 | 0.89 (0.62-1.28) |  |  | 0.87 (0.59-1.28) |  |  | 1.18 (0.81-1.72) |  |  | 0.87 (0.60-1.27) |  |  | 0.95 (0.60-1.51) |  |  | 1.07 (0.74-1.55) |  | |
| Dyslipidemia | No |  |  | 0.899 |  |  | 0.732 |  |  | 0.496 |  |  | 0.628 |  |  | 0.498 |  |  | 0.793 | |
| Q1 | Reference |  |  | Reference |  |  | Reference |  |  | Reference |  |  | Reference |  |  | Reference |  | |
| Q2 | 0.85 (0.69-1.06) |  |  | 1.02 (0.81-1.30) |  |  | 1.17 (0.92-1.48) |  |  | 0.97 (0.77-1.21) |  |  | 1.09 (0.86-1.38) |  |  | 1.05 (0.84-1.33) |  | |
| Q3 | 1.05 (0.85-1.29) |  |  | 1.28 (1.01-1.63) |  |  | 1.16 (0.91-1.49) |  |  | 1.09 (0.88-1.36) |  |  | 1.02 (0.78-1.34) |  |  | 1.25 (1.00-1.57) |  | |
| Q4 | 1.16 (0.95-1.44) |  |  | 1.49 (1.16-1.93) |  |  | 1.51 (1.17-1.96) |  |  | 1.39 (1.11-1.73) |  |  | 1.37 (1.02-1.84) |  |  | 1.55 (1.22-1.96) |  | |
| Yes | Q1 | Reference |  |  | Reference |  |  | Reference |  |  | Reference |  |  | Reference |  |  | Reference |  | |
| Q2 | 0.88 (0.76-1.03) |  |  | 1.00 (0.85-1.18) |  |  | 0.99 (0.84-1.18) |  |  | 1.01 (0.86-1.18) |  |  | 1.10 (0.92-1.31) |  |  | 1.18 (1.00-1.38) |  | |
| Q3 | 1.11 (0.96-1.29) |  |  | 1.10 (0.93-1.31) |  |  | 1.09 (0.92-1.29) |  |  | 1.10 (0.94-1.28) |  |  | 0.99 (0.81-1.21) |  |  | 1.19 (1.02-1.40) |  | |
| Q4 | 1.07 (0.92-1.25) |  |  | 1.26 (1.06-1.5) |  |  | 1.34 (1.13-1.59) |  |  | 1.23 (1.05-1.44) |  |  | 1.25 (1.02-1.53) |  |  | 1.45 (1.24-1.71) |  | |

TyG, triglyceride glucose; WC, waist circumference; WHR, waist to hip ratio; BMI, body mass index; NC, neck circumference; WHtR, waist to height ratio; OR, odds ratio; CI, confidence interval
