# Supplementary material for: Association of triglyceride-glucose index and its combined obesity indicators and kidney stones in the non-diabetic population of southwestern China
Source: Research Square preprint supplement (doi:10.21203/rs.3.rs-8643580/v1), 2026-02-22
Supplement: Supplementary file 3 [file b74553af9350b09e9b9cc93a.docx]

| **Table 2**  Association between TyG and its combined indicators with KSs | | | | | | | | | | | | | | |
| --- | --- | --- | --- | --- | --- | --- | --- | --- | --- | --- | --- | --- | --- | --- |
| Subgroup | Case/N | | Crude model | | | Model 1 | | | Model 2 | | | Model 3 | | |
| OR (95% CI) | P value | P for trend | OR (95% CI) | P value | P for trend | OR (95% CI) | P value | P for trend | OR (95% CI) | P value | P for trend |
| TyG index |  |  |  |  | <0.001 |  |  | <0.001 |  |  | <0.001 |  |  | <0.001 |
| Q1 | 438/21854 | | Reference |  |  | Reference |  |  | Reference |  |  | Reference |  |  |
| Q2 | 586/21849 | | 1.35 (1.19-1.53) | <0.001 |  | 1.15 (1.01-1.31) | 0.030 |  | 1.14 (1.01-1.3) | 0.037 |  | 1.14 (1.01-1.3) | 0.040 |  |
| Q3 | 693/21847 | | 1.6 (1.42-1.81) | <0.001 |  | 1.25 (1.1-1.42) | <0.001 |  | 1.22 (1.08-1.39) | 0.002 |  | 1.22 (1.07-1.38) | 0.003 |  |
| Q4 | 858/21849 | | 2 (1.78-2.25) | <0.001 |  | 1.44 (1.28-1.63) | <0.001 |  | 1.38 (1.22-1.57) | <0.001 |  | 1.36 (1.2-1.55) | <0.001 |  |
| TyG-WC index |  |  |  |  | <0.001 |  |  | <0.001 |  |  | <0.001 |  |  | <0.001 |
| Q1 | 377/21850 | | Reference |  |  | Reference |  |  | Reference |  |  | Reference |  |  |
| Q2 | 543/21850 | | 1.45 (1.27-1.66) | <0.001 |  | 1.15 (1-1.32) | 0.047 |  | 1.15 (1-1.32) | 0.053 |  | 1.14 (1-1.32) | 0.059 |  |
| Q3 | 704/21849 | | 1.9 (1.67-2.15) | <0.001 |  | 1.29 (1.12-1.49) | <0.001 |  | 1.26 (1.09-1.45) | 0.002 |  | 1.25 (1.08-1.44) | 0.002 |  |
| Q4 | 951/21850 | | 2.59 (2.3-2.93) | <0.001 |  | 1.63 (1.41-1.87) | <0.001 |  | 1.53 (1.33-1.77) | <0.001 |  | 1.52 (1.31-1.76) | <0.001 |  |
| TyG-WHR index |  |  |  |  | <0.001 |  |  | <0.001 |  |  | <0.001 |  |  | <0.001 |
| Q1 | 376/21850 | | Reference |  |  | Reference |  |  | Reference |  |  | Reference |  |  |
| Q2 | 526/21850 | | 1.41 (1.23-1.61) | <0.001 |  | 1.13 (0.98-1.3) | 0.090 |  | 1.12 (0.98-1.29) | 0.103 |  | 1.12 (0.98-1.29) | 0.107 |  |
| Q3 | 705/21849 | | 1.9 (1.68-2.16) | <0.001 |  | 1.31 (1.14-1.51) | <0.001 |  | 1.28 (1.11-1.48) | <0.001 |  | 1.28 (1.11-1.48) | <0.001 |  |
| Q4 | 968/21850 | | 2.65 (2.35-2.99) | <0.001 |  | 1.69 (1.47-1.94) | <0.001 |  | 1.59 (1.38-1.84) | <0.001 |  | 1.59 (1.37-1.84) | <0.001 |  |
| TyG-BMI index |  |  |  |  | <0.001 |  |  | <0.001 |  |  | <0.001 |  |  | <0.001 |
| Q1 | 435/21850 | | Reference |  |  | Reference |  |  | Reference |  |  | Reference |  |  |
| Q2 | 541/21850 | | 1.25 (1.1-1.42) | <0.001 |  | 1.03 (0.91-1.18) | 0.62 |  | 1.03 (0.9-1.17) | 0.669 |  | 1.02 (0.9-1.17) | 0.714 |  |
| Q3 | 687/21849 | | 1.6 (1.42-1.81) | <0.001 |  | 1.17 (1.03-1.33) | 0.0163 |  | 1.14 (1-1.3) | 0.045 |  | 1.13 (0.99-1.29) | 0.062 |  |
| Q4 | 912/21850 | | 2.14 (1.91-2.41) | <0.001 |  | 1.48 (1.31-1.68) | <0.001 |  | 1.4 (1.23-1.59) | <0.001 |  | 1.38 (1.21-1.58) | <0.001 |  |
| TyG-NC index |  |  |  |  | <0.001 |  |  | <0.001 |  |  | <0.001 |  |  | <0.001 |
| Q1 | 389/21850 | | Reference |  |  | Reference |  |  | Reference |  |  | Reference |  |  |
| Q2 | 509/21850 | | 1.32 (1.15-1.5) | <0.001 |  | 1.02 (0.89-1.18) | 0.735 |  | 1.02 (0.88-1.17) | 0.824 |  | 1.01 (0.88-1.17) | 0.871 |  |
| Q3 | 703/21849 | | 1.83 (1.62-2.08) | <0.001 |  | 1.16 (0.99-1.35) | 0.066 |  | 1.12 (0.96-1.31) | 0.160 |  | 1.11 (0.94-1.3) | 0.213 |  |
| Q4 | 974/21850 | | 2.57 (2.29-2.9) | <0.001 |  | 1.51 (1.28-1.77) | <0.001 |  | 1.4 (1.19-1.64) | <0.001 |  | 1.37 (1.16-1.62) | <0.001 |  |
| TyG-WHtR index |  |  |  |  | <0.001 |  |  | <0.001 |  |  | <0.001 |  |  | <0.001 |
| Q1 | 384/21850 | | Reference |  |  | Reference |  |  | Reference |  |  | Reference |  |  |
| Q2 | 554/21850 | | 1.45 (1.28-1.66) | <0.001 |  | 1.2 (1.05-1.38) | 0.007 |  | 1.2 (1.05-1.37) | 0.008 |  | 1.2 (1.05-1.37) | 0.009 |  |
| Q3 | 733/21849 | | 1.94 (1.71-2.2) | <0.001 |  | 1.43 (1.25-1.64) | <0.001 |  | 1.4 (1.22-1.6) | <0.001 |  | 1.39 (1.22-1.59) | <0.001 |  |
| Q4 | 904/21850 | | 2.41 (2.14-2.73) | <0.001 |  | 1.69 (1.49-1.93) | <0.001 |  | 1.6 (1.41-1.83) | <0.001 |  | 1.6 (1.39-1.84) | <0.001 |  |
| TyG, triglyceride glucose; WC, waist circumference; WHR, waist to hip ratio; BMI, body mass index; NC, neck circumference; WHtR, waist to height ratio; OR, odds ratio; CI, confidence interval  Model 1: Adjusted for age and sex Model 2: Adjusted for age, sex, smoking, drinking, hypertension Model 3: Adjusted for age, sex, smoking, drinking, hypertension, Ca, HbA1c, eGFR, UA | | | | | | | | | | | | | | |
